# Supplementary material for: Increased circulating cell signalling phosphoproteins in sera are useful for the detection of pancreatic cancer
Source: PubMed Central journal article supplement (PMC2906731; doi:10.1038/sj.bjc.6605734), 2010-06-15
Supplement: 6605734x4.pdf [file 6605734x4.pdf]

| Type | Description       | p-Akt (75) | p-ERK1/2 (38) | p-GSK-3a/b (18) | p-IkB-a (58) | p-JNK (34) |
|------|-------------------|------------|---------------|-----------------|--------------|------------|
| C1   | EGF HEK293        | 520        | 21313         | 8990            | 187          | 399        |
| C2   | EGF HeLa          | 258        | 23301         | 6330            | 268          | 432        |
| C3   | INF-alpha HeLa    | 288        | 1575          | 5475            | 281          | 176        |
| C4   | M-phase HeLa      | 179        | 2285          | 3457            | 378          | 189        |
| C5   | NGFb PC12         | 870        | 24126         | 11485           | 417          | 1169       |
| C6   | TNF-a HeLa        | 159        | 10530         | 4349            | 6185         | 311        |
| C7   | UV- HEK293        | 640        | 9808          | 9926            | 233          | 7410       |
| C8   | Untreated HeLa Ly | 146        | 727           | 2267            | 220          | 85         |
| X1   | PCa1              | 57         | 79            | 540             | 120          | 21         |
| X2   | PCa2              | 56         | 32            | 1158            | 100          | 18         |
| X3   | PCa3              | 55         | 117           | 1163            | 175          | 15         |
| X4   | PCa4              | 62         | 267           | 1397            | 200          | 21         |
| X5   | PCa5              | 60         | 74            | 1094            | 142          | 15         |
| X6   | PCa6              | 56         | 65            | 916             | 123          | 19         |
| X7   | PCa7              | 52         | 48            | 492             | 133          | 21         |
| X8   | PCa8              | 182        | 116           | 763             | 146          | 85         |
| X9   | PCa9              | 56         | 71            | 218             | 78           | 19         |
| X10  | PCa10             | 59         | 37            | 471             | 92           | 15         |
| X11  | PCa11             | 62         | 159           | 1467            | 177          | 20         |
| X12  | PCa12             | 138        | 62            | 1126            | 106          | 19         |
| X13  | PCa13             | 48         | 68            | 810             | 130          | 15         |
| X14  | PCa14             | 58         | 31            | 174             | 74           | 14         |
| X15  | PCa15             | 51         | 103           | 1010            | 104          | 21         |
| X16  | PCa16             | 57         | 13            | 596             | 83           | 19         |
| X17  | PCa17             | 59         | 63            | 1148            | 120          | 18         |
| X18  | PCa18             | 57         | 158           | 950             | 147          | 20         |
| X19  | PCa19             | 47         | 157           | 387             | 88           | 34         |
| X20  | PCa20             | 55         | 266           | 973             | 186          | 19         |
| X21  | PCa21             | 53         | 97            | 641             | 131          | 20         |
| X22  | PCa22             | 51         | 224           | 719             | 80           | 17         |
| X23  | PCa23             | 62         | 58            | 270             | 142          | 14         |
| X24  | PCa24             | 89         | 89            | 1040            | 87           | 24         |
| X25  | PCa25             | 62         | 27            | 1041            | 70           | 15         |
| X26  | PCa26             | 51         | 41            | 851             | 85           | 15         |
| X27  | HV1               | 47         | 16            | 1164            | 93           | 28         |
| X28  | HV2               | 47         | 53            | 602             | 89           | 19         |
| X29  | HV3               | 50         | 47            | 1250            | 180          | 17         |
| X30  | HV4               | 50         | 25            | 1031            | 89           | 16         |
| X31  | HV5               | 44         | 46            | 771             | 120          | 20         |
| X32  | HV6               | 54         | 39            | 1272            | 97           | 18         |
| X33  | HV7               | 51         | 21            | 1046            | 54           | 18         |
| X34  | HV8               | 54         | 21            | 1042            | 123          | 16         |
| X35  | HV9               | 56         | 22            | 1129            | 128          | 15         |
| X36  | HV10              | 56         | 18            | 1223            | 104          | 15         |
| X37  | HV11              | 54         | 12            | 1079            | 67           | 19         |
| X38  | HV12              | 49         | 7             | 425             | 71           | 12         |
| X39  | HV13              | 49         | 12            | 271             | 74           | 18         |
| X40  | HV14              | 51         | 9             | 293             | 73           | 15         |
| X41  | HV15              | 110        | 13            | 672             | 67           | 15         |
| X42  | HV16              | 50         | 8             | 633             | 70           | 16         |
| X43  | HV17              | 45         | 9             | 669             | 74           | 14         |
| X44  | HV18              | 50         | 6             | 370             | 68           | 14         |
| X45  | HV19              | 52         | 52            | 332             | 70           | 19         |
| X46  | HV20              | 53         | 8             | 638             | 67           | 22         |
| X47  | HV21              | 53         | 11            | 300             | 63           | 15         |
| X48  | HV22              | 51         | 12            | 856             | 73           | 14         |
| X49  | HV23              | 47         | 9             | 231             | 73           | 15         |
| X50  | HV24              | 44         | 14            | 208             | 65           | 16         |
| X51  | HV25              | 44         | 15            | 567             | 63           | 18         |
