# Supplementary material for: Increased circulating cell signalling phosphoproteins in sera are useful for the detection of pancreatic cancer
Source: PubMed Central journal article supplement (PMC2906731; doi:10.1038/sj.bjc.6605734), 2010-06-15
Supplement: 6605734x5.pdf [file 6605734x5.pdf]

| Type | Description       | p-p38 MAPK (36) | p-p70 S6 Kinase (55) | p-p90RSK (35) | p-STAT2 (32) |
|------|-------------------|-----------------|----------------------|---------------|--------------|
| C1   | EGF HEK293        | 277             | 3601                 | 430           | 88           |
| C2   | EGF HeLa          | 420             | 6414                 | 525           | 159          |
| C3   | INF-alpha HeLa    | 237             | 2467                 | 334           | 17551        |
| C4   | M-phase HeLa      | 809             | 13980                | 327           | 124          |
| C5   | NGFb PC12         | 1108            | 9065                 | 3047          | 122          |
| C6   | TNF-a HeLa        | 508             | 3694                 | 321           | 93           |
| C7   | UV- HEK293        | 1623            | 9670                 | 309           | 134          |
| C8   | Untreated HeLa Ly | 155             | 619                  | 230           | 87           |
| X1   | PCa1              | 51              | 200                  | 105           | 23           |
| X2   | PCa2              | 39              | 223                  | 156           | 21           |
| X3   | PCa3              | 43              | 243                  | 115           | 23           |
| X4   | PCa4              | 58              | 330                  | 149           | 24           |
| X5   | PCa5              | 49              | 231                  | 111           | 21           |
| X6   | PCa6              | 43              | 180                  | 103           | 20           |
| X7   | PCa7              | 44              | 237                  | 118           | 21           |
| X8   | PCa8              | 72              | 341                  | 199           | 64           |
| X9   | PCa9              | 44              | 242                  | 121           | 18           |
| X10  | PCa10             | 50              | 223                  | 123           | 18           |
| X11  | PCa11             | 43              | 270                  | 121           | 23           |
| X12  | PCa12             | 47              | 245                  | 122           | 23           |
| X13  | PCa13             | 49              | 227                  | 114           | 20           |
| X14  | PCa14             | 40              | 115                  | 73            | 18           |
| X15  | PCa15             | 55              | 222                  | 125           | 18           |
| X16  | PCa16             | 39              | 162                  | 86            | 19           |
| X17  | PCa17             | 50              | 241                  | 115           | 20           |
| X18  | PCa18             | 49              | 288                  | 137           | 21           |
| X19  | PCa19             | 46              | 463                  | 109           | 17           |
| X20  | PCa20             | 57              | 269                  | 142           | 20           |
| X21  | PCa21             | 56              | 500                  | 216           | 18           |
| X22  | PCa22             | 68              | 217                  | 110           | 22           |
| X23  | PCa23             | 56              | 207                  | 109           | 21           |
| X24  | PCa24             | 93              | 1214                 | 199           | 17           |
| X25  | PCa25             | 46              | 141                  | 77            | 18           |
| X26  | PCa26             | 42              | 132                  | 86            | 19           |
| X27  | HV1               | 50              | 185                  | 115           | 18           |
| X28  | HV2               | 53              | 280                  | 152           | 17           |
| X29  | HV3               | 51              | 218                  | 93            | 19           |
| X30  | HV4               | 48              | 222                  | 98            | 18           |
| X31  | HV5               | 50              | 213                  | 127           | 18           |
| X32  | HV6               | 50              | 179                  | 92            | 17           |
| X33  | HV7               | 55              | 164                  | 85            | 13           |
| X34  | HV8               | 42              | 201                  | 114           | 19           |
| X35  | HV9               | 46              | 172                  | 97            | 19           |
| X36  | HV10              | 45              | 147                  | 91            | 16           |
| X37  | HV11              | 47              | 174                  | 86            | 15           |
| X38  | HV12              | 42              | 130                  | 76            | 19           |
| X39  | HV13              | 37              | 118                  | 63            | 16           |
| X40  | HV14              | 36              | 127                  | 69            | 18           |
| X41  | HV15              | 44              | 179                  | 70            | 16           |
| X42  | HV16              | 38              | 136                  | 74            | 16           |
| X43  | HV17              | 35              | 101                  | 60            | 17           |
| X44  | HV18              | 30              | 91                   | 58            | 16           |
| X45  | HV19              | 39              | 125                  | 63            | 16           |
| X46  | HV20              | 38              | 181                  | 96            | 18           |
| X47  | HV21              | 42              | 131                  | 86            | 14           |
| X48  | HV22              | 41              | 149                  | 73            | 16           |
| X49  | HV23              | 38              | 115                  | 71            | 16           |
| X50  | HV24              | 40              | 156                  | 79            | 16           |
| X51  | HV25              | 39              | 342                  | 151           | 18           |
