# Supplementary material for: Increased circulating cell signalling phosphoproteins in sera are useful for the detection of pancreatic cancer
Source: PubMed Central journal article supplement (PMC2906731; doi:10.1038/sj.bjc.6605734), 2010-06-15
Supplement: 6605734x6.pdf [file 6605734x6.pdf]

| Type | Description       | p-STAT3 (52) | p-TrkA (73) | c-Jun (56) | CREB (19) | Histone H3 (77) |
|------|-------------------|--------------|-------------|------------|-----------|-----------------|
| C1   | EGF HEK293        | 43           | 124         | 2239       | 3251      | 280             |
| C2   | EGF HeLa          | 290          | 184         | 1838       | 1220      | 587             |
| C3   | INF-alpha HeLa    | 15400        | 134         | 299        | 803       | 509             |
| C4   | M-phase HeLa      | 117          | 160         | 11518      | 3383      | 4296            |
| C5   | NGFb PC12         | 93           | 813         | 14366      | 2269      | 579             |
| C6   | TNF-a HeLa        | 105          | 132         | 765        | 727       | 440             |
| C7   | UV- HEK293        | 59           | 142         | 21399      | 2481      | 284             |
| C8   | Untreated HeLa Ly | 176          | 123         | 109        | 246       | 151             |
| X1   | PCa1              | 19           | 70          | 90         | 129       | 41              |
| X2   | PCa2              | 22           | 68          | 52         | 110       | 47              |
| X3   | PCa3              | 23           | 69          | 30         | 113       | 47              |
| X4   | PCa4              | 22           | 75          | 32         | 84        | 48              |
| X5   | PCa5              | 20           | 67          | 27         | 107       | 46              |
| X6   | PCa6              | 19           | 64          | 36         | 72        | 38              |
| X7   | PCa7              | 22           | 65          | 47         | 75        | 50              |
| X8   | PCa8              | 36           | 122         | 77         | 157       | 86              |
| X9   | PCa9              | 22           | 71          | 26         | 136       | 45              |
| X10  | PCa10             | 24           | 67          | 27         | 96        | 45              |
| X11  | PCa11             | 20           | 73          | 27         | 101       | 51              |
| X12  | PCa12             | 21           | 88          | 30         | 110       | 59              |
| X13  | PCa13             | 20           | 73          | 21         | 67        | 42              |
| X14  | PCa14             | 20           | 55          | 18         | 42        | 39              |
| X15  | PCa15             | 21           | 68          | 32         | 108       | 48              |
| X16  | PCa16             | 18           | 61          | 39         | 41        | 34              |
| X17  | PCa17             | 25           | 67          | 30         | 81        | 39              |
| X18  | PCa18             | 21           | 73          | 30         | 199       | 45              |
| X19  | PCa19             | 25           | 113         | 34         | 143       | 154             |
| X20  | PCa20             | 21           | 65          | 29         | 138       | 53              |
| X21  | PCa21             | 22           | 177         | 31         | 146       | 126             |
| X22  | PCa22             | 31           | 69          | 33         | 118       | 60              |
| X23  | PCa23             | 64           | 75          | 123        | 197       | 45              |
| X24  | PCa24             | 30           | 370         | 126        | 101       | 303             |
| X25  | PCa25             | 20           | 57          | 27         | 43        | 37              |
| X26  | PCa26             | 21           | 62          | 32         | 48        | 38              |
| X27  | HV1               | 21           | 86          | 25         | 32        | 56              |
| X28  | HV2               | 26           | 106         | 37         | 61        | 78              |
| X29  | HV3               | 20           | 62          | 23         | 123       | 43              |
| X30  | HV4               | 23           | 94          | 26         | 47        | 56              |
| X31  | HV5               | 21           | 74          | 23         | 51        | 50              |
| X32  | HV6               | 19           | 70          | 844        | 827       | 39              |
| X33  | HV7               | 19           | 54          | 22         | 103       | 34              |
| X34  | HV8               | 23           | 64          | 38         | 84        | 48              |
| X35  | HV9               | 20           | 66          | 41         | 64        | 46              |
| X36  | HV10              | 20           | 57          | 80         | 36        | 41              |
| X37  | HV11              | 18           | 65          | 21         | 30        | 37              |
| X38  | HV12              | 20           | 54          | 23         | 25        | 40              |
| X39  | HV13              | 18           | 52          | 20         | 32        | 37              |
| X40  | HV14              | 18           | 51          | 53         | 54        | 37              |
| X41  | HV15              | 29           | 62          | 20         | 31        | 46              |
| X42  | HV16              | 20           | 60          | 23         | 34        | 50              |
| X43  | HV17              | 16           | 55          | 22         | 46        | 33              |
| X44  | HV18              | 19           | 54          | 21         | 24        | 31              |
| X45  | HV19              | 19           | 55          | 23         | 39        | 37              |
| X46  | HV20              | 18           | 80          | 51         | 19        | 55              |
| X47  | HV21              | 19           | 62          | 59         | 34        | 39              |
| X48  | HV22              | 19           | 57          | 48         | 47        | 36              |
| X49  | HV23              | 20           | 53          | 24         | 22        | 40              |
| X50  | HV24              | 19           | 51          | 25         | 24        | 42              |
| X51  | HV25              | 20           | 124         | 42         | 32        | 104             |
