# Supplementary material for: Increased circulating cell signalling phosphoproteins in sera are useful for the detection of pancreatic cancer
Source: PubMed Central journal article supplement (PMC2906731; doi:10.1038/sj.bjc.6605734), 2010-06-15
Supplement: 6605734x7.pdf [file 6605734x7.pdf]

| Type | Description       | HSP27 (51) | IRS-1 (76) | MEK1 (40) | p53 (53) |
|------|-------------------|------------|------------|-----------|----------|
| C1   | EGF HEK293        | 128        | 534        | 6072      | 781      |
| C2   | EGF HeLa          | 6815       | 583        | 12571     | 137      |
| C3   | INF-alpha HeLa    | 805        | 248        | 819       | 84       |
| C4   | M-phase HeLa      | 7559       | 2028       | 975       | 68       |
| C5   | NGFb PC12         | 354        | 3040       | 6228      | 225      |
| C6   | TNF-a HeLa        | 12333      | 192        | 2554      | 82       |
| C7   | UV- HEK293        | 194        | 847        | 1040      | 2394     |
| C8   | Untreated HeLa Ly | 1621       | 110        | 290       | 59       |
| X1   | PCa1              | 46         | 43         | 71        | 29       |
| X2   | PCa2              | 56         | 42         | 38        | 29       |
| X3   | PCa3              | 35         | 43         | 21        | 25       |
| X4   | PCa4              | 48         | 49         | 133       | 30       |
| X5   | PCa5              | 85         | 44         | 50        | 28       |
| X6   | PCa6              | 47         | 44         | 54        | 31       |
| X7   | PCa7              | 48         | 41         | 49        | 29       |
| X8   | PCa8              | 77         | 152        | 367       | 35       |
| X9   | PCa9              | 78         | 41         | 93        | 25       |
| X10  | PCa10             | 56         | 40         | 40        | 31       |
| X11  | PCa11             | 53         | 46         | 116       | 37       |
| X12  | PCa12             | 77         | 44         | 60        | 30       |
| X13  | PCa13             | 44         | 41         | 22        | 30       |
| X14  | PCa14             | 32         | 39         | 27        | 28       |
| X15  | PCa15             | 80         | 40         | 82        | 29       |
| X16  | PCa16             | 38         | 38         | 25        | 47       |
| X17  | PCa17             | 129        | 42         | 57        | 26       |
| X18  | PCa18             | 60         | 45         | 94        | 30       |
| X19  | PCa19             | 216        | 43         | 102       | 23       |
| X20  | PCa20             | 251        | 46         | 151       | 29       |
| X21  | PCa21             | 165        | 94         | 103       | 26       |
| X22  | PCa22             | 57         | 49         | 71        | 29       |
| X23  | PCa23             | 85         | 41         | 37        | 33       |
| X24  | PCa24             | 358        | 48         | 44        | 50       |
| X25  | PCa25             | 29         | 39         | 25        | 32       |
| X26  | PCa26             | 34         | 40         | 37        | 28       |
| X27  | HV1               | 120        | 42         | 93        | 25       |
| X28  | HV2               | 190        | 51         | 79        | 25       |
| X29  | HV3               | 67         | 39         | 52        | 29       |
| X30  | HV4               | 110        | 46         | 36        | 27       |
| X31  | HV5               | 59         | 41         | 88        | 30       |
| X32  | HV6               | 40         | 40         | 93        | 25       |
| X33  | HV7               | 29         | 36         | 37        | 27       |
| X34  | HV8               | 76         | 41         | 36        | 30       |
| X35  | HV9               | 67         | 42         | 45        | 28       |
| X36  | HV10              | 40         | 40         | 34        | 24       |
| X37  | HV11              | 54         | 38         | 25        | 24       |
| X38  | HV12              | 64         | 39         | 20        | 27       |
| X39  | HV13              | 38         | 37         | 26        | 24       |
| X40  | HV14              | 39         | 35         | 25        | 22       |
| X41  | HV15              | 107        | 37         | 19        | 31       |
| X42  | HV16              | 81         | 40         | 21        | 25       |
| X43  | HV17              | 29         | 36         | 18        | 26       |
| X44  | HV18              | 27         | 35         | 19        | 24       |
| X45  | HV19              | 34         | 35         | 36        | 21       |
| X46  | HV20              | 59         | 39         | 22        | 22       |
| X47  | HV21              | 27         | 36         | 20        | 25       |
| X48  | HV22              | 36         | 46         | 21        | 24       |
| X49  | HV23              | 43         | 32         | 22        | 27       |
| X50  | HV24              | 46         | 39         | 18        | 24       |
| X51  | HV25              | 76         | 41         | 26        | 27       |
